# Supplementary material for: Rectification inversion in oxygen substituted graphyne–graphene-based heterojunctions
Source: Royal Society of Chemistry journal article supplement (doi:10.1039/c4cp04859h), 2014-12-03
Supplement: c4cp04859h1.pdf [file c4cp04859h1.pdf]

## Supplementary Information

### Rectification inversion in the oxygen substitution graphyne-graphene-based heterojunctions

Wen-kai Zhao<sup>1</sup>, Bin Cui<sup>1</sup>, Chang-feng Fang<sup>2</sup>, Guo-min Ji<sup>1</sup>, Jing-fen Zhao<sup>1</sup>, Xiang-ru Kong<sup>1</sup>, Dong-qing Zou<sup>1</sup>, Xiao-hui Jiang<sup>2,3</sup>, Dong-mei Li<sup>1</sup>, De-sheng Liu\*<sup>1,2</sup>

<sup>1</sup>School of Physics, State Key Laboratory of Crystal Materials, Shandong University, Jinan 250100, People's Republic of China.

<sup>2</sup>Department of Physics, Jining University, Qufu 273155, People's Republic of China

<sup>3</sup>College of Physics and Engineering, Qufu Normal University, Qufu 273155 People's Republic of China

\* Corresponding author: liuds@sdu.edu.cn

#### Section. 1

The geometry of left electrode of system A has been characterized in Figure S1 and Table S1. According to our simulation models, the carbon atom is bonded to oxygen using a double bond, which can be inferred by the bond length of C<sub>1</sub>-O. For graphyne nanoribbon, there are two types of hybridized forms for carbon atoms according to hybrid orbital theories. All the carbons contained in the six-membered ring are sp<sup>2</sup>- hybridization (named C<sub>1</sub>-C<sub>6</sub>), and two carbons between the six-membered ring are sp- hybridization (named C<sub>7</sub>-C<sub>8</sub>). Consequently, the framework of six-membered ring is constructed by C<sub>1</sub> (sp<sup>2</sup>)-C<sub>2</sub> (sp<sup>2</sup>) sigma orbital. C<sub>4</sub> (sp<sup>2</sup>)-C<sub>7</sub> (sp) and C<sub>7</sub> (sp)-C<sub>8</sub> (sp) sigma orbitals constitute the joint of six-membered ring. The hydrogen is bonded to the carbon through C<sub>1</sub> (sp<sup>2</sup>)-H<sub>1</sub> (s) sigma orbital. On the

vertical direction of current in the backbone,  $C_1$  (pz)- $C_2$  (pz),  $C_4$  (pz)- $C_7$  (pz) and  $C_7$  (pz)- $C_8$  (pz) stand side by side, which form large pi conjugated orbital. When a hydrogen is substituted by an oxygen, carbon atom and oxygen atom will form double bond. One of them is a stronger sigma orbital, and the other O (pz) will form extended pi conjugated orbital with originally formed carbon large pi conjugated orbital.

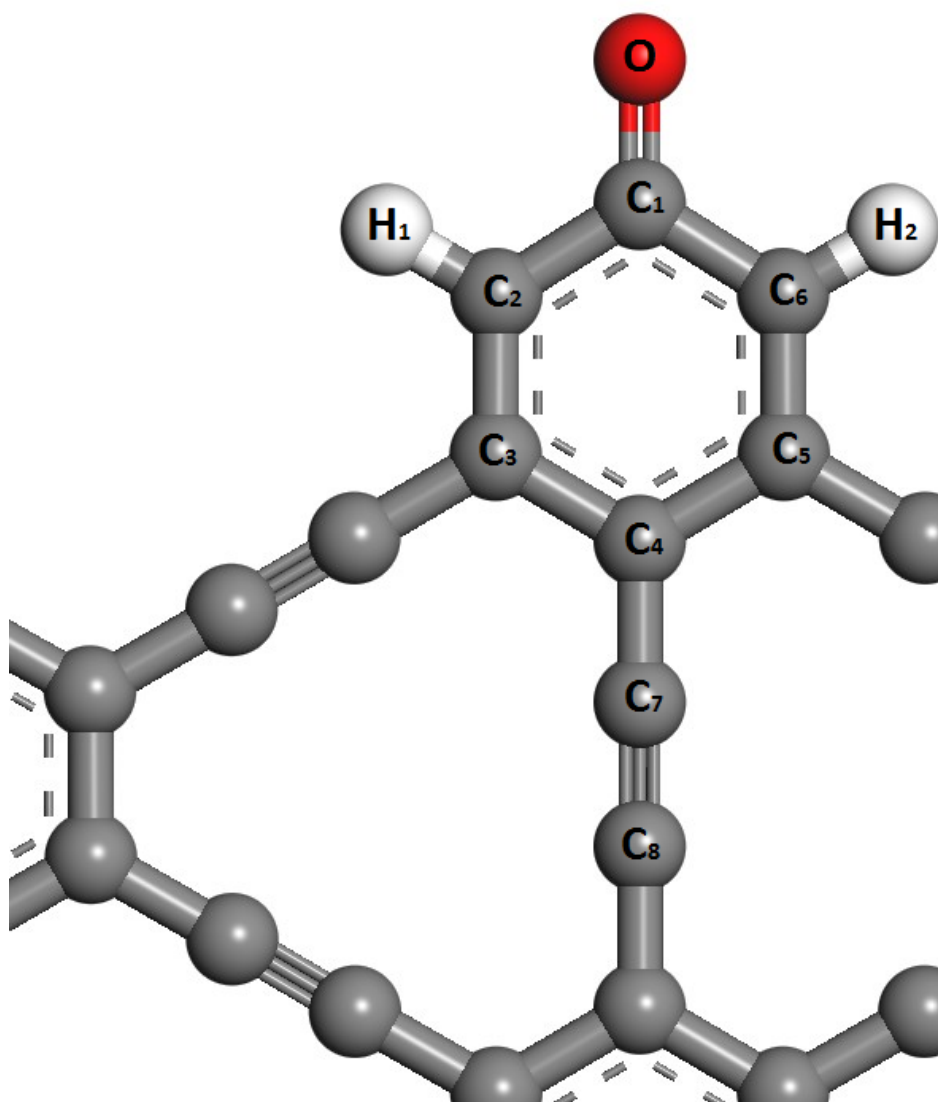

Figure S1. Schematic diagram of the left electrode of system A

Table S1: Some selected geometric parameters of the left electrode of system A. the unit of Bond length is angstrom ( $\text{\AA}$ )

|                              | $C_1$ - $C_2$ | $C_2$ - $C_3$ | $C_3$ - $C_4$ | $C_4$ - $C_7$ | $C_7$ - $C_8$ | $C_1$ -O |
|------------------------------|---------------|---------------|---------------|---------------|---------------|----------|
| Bond length ( $\text{\AA}$ ) | 1.456         | 1.378         | 1.447         | 1.369         | 1.235         | 1.236    |

## Section. 2

In order to investigate whether the widths of the nanoribbon have effective influences to the transport properties, we build two kinds of different widths of Graphyne and Graphene nanoribbons as shown in Figure S1. Here, geometrical structures of b and d possess mirror symmetry under the  $xz$  midplane mirror operation. The corresponding energy bands and  $\Gamma$ -point Bloch wave functions are plotted in Figure S2 and S3. The structure of energy bands of system a, b and D (in Figure 4(a)) are distinctly different. But there is only trivial difference between system c and d. Meanwhile, the  $b_2$ - and  $b_3$ - subbands have even parity, and  $b_1$ - subbands have odd parity, which are different from system D in Figure 5. Therefore, the transport properties will vary with the widths of the graphyne nanoribbon.

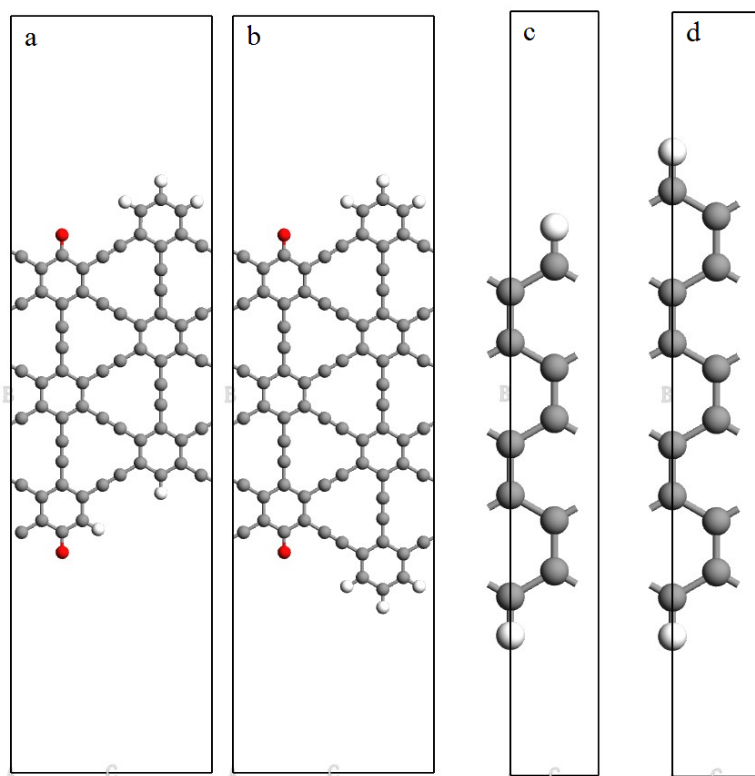

Figure S2. Different widths of graphyne nanoribbons (a, b) and graphene nanoribbons (c, d).

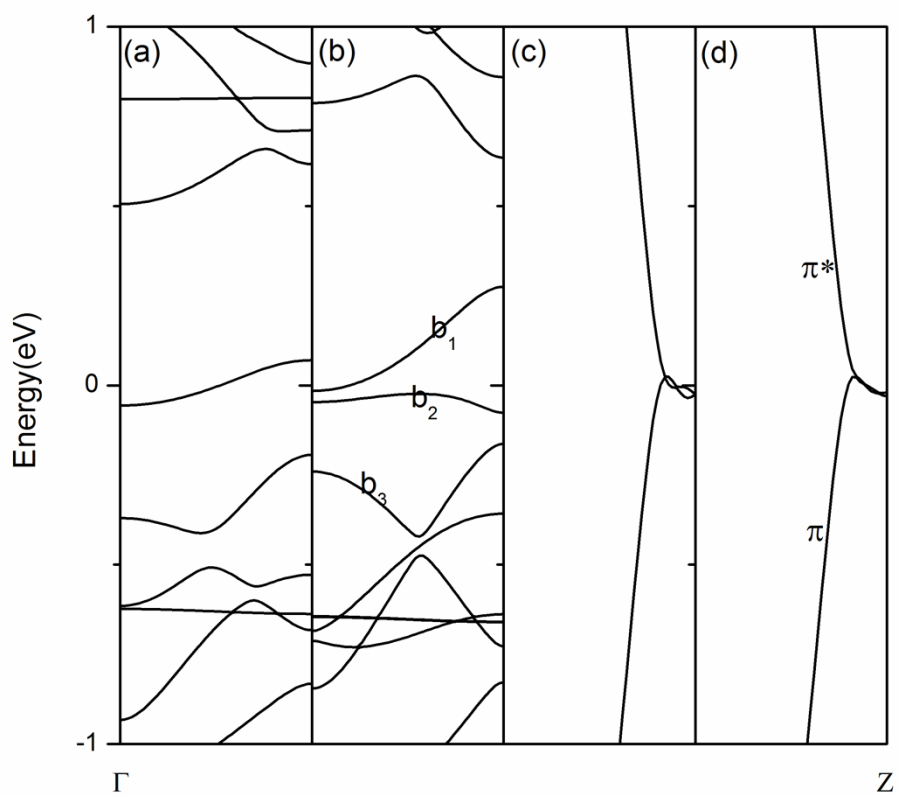

Figure S3. The calculated energy band of the four structures in the Figure S1.

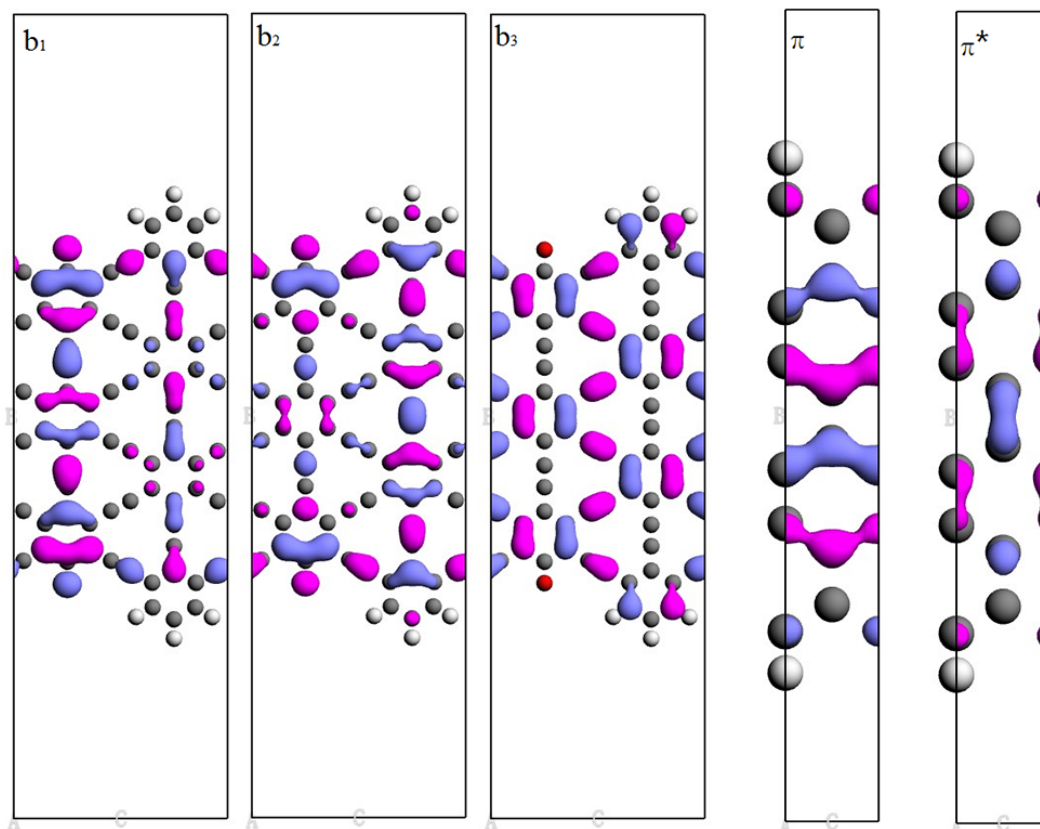

Figure S4. Isosurface plots of the  $\Gamma$ -point Bloch wave functions of  $b_1$ -,  $b_2$ -,  $b_3$ -,  $\pi^*$ -

and  $\pi$ - subbands of the structures in Figure S2 (b) and (d). Different colors represent different phase.
